# Supplementary material for: Morphological Differences in the Inferior Oblique Muscles from Subjects with Over-elevation in Adduction
Source: PubMed Central journal article supplement — Invest Ophthalmol Vis Sci. 2020 Jun 15;61(6):33. doi: 10.1167/iovs.61.6.33 (PMC7415317; doi:10.1167/iovs.61.6.33), 2020-06-15

Supplemental Figure 1: Myosin heavy chain (MyHC) isoform expression patterns in inferior oblique muscles from children with primary inferior oblique overaction (IOOA), Apert syndrome (Apert), and controls immunostained for (A) pan fast, (B) type IIA, (C) EOM specific and (D) slow twitch MyHC. No significant differences were seen.

Supplemental Figure 1

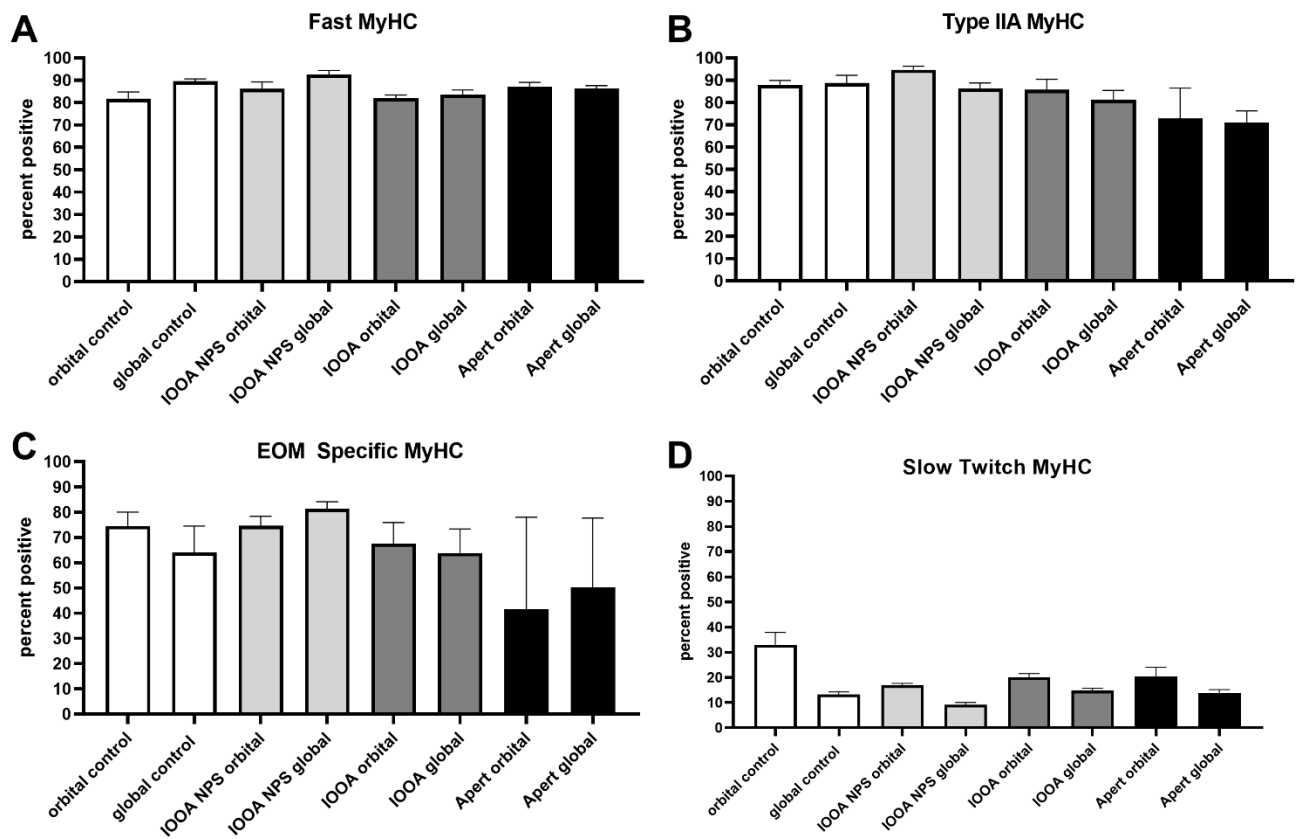

Supplement: iovs-61-6-33_s001.pdf [file iovs-61-6-33_s001.pdf]
